# Supplementary material for: The Fatty Acid-Based Erythrocyte Membrane Lipidome in Dogs with Chronic Enteropathy
Source: MDPI journal article supplement (doi:10.3390/ani11092604), 2021-09-05
Supplement: s1 [file s1]

Supplementary Material

# The fatty acid-based erythrocyte membrane lipidome in dogs with chronic enteropathy

Paolo E. Crisi<sup>1</sup>, Alessia Luciani<sup>1†</sup>, Morena Di Tommaso<sup>1†</sup>, Paraskevi Prasinou<sup>1</sup>, Francesca De Santis<sup>1</sup>, Chrysostomos Chatgililoglu<sup>2</sup>, Marco Pietra<sup>3</sup>, Fabio Procoli<sup>4</sup>, Anna Sansone<sup>2</sup>, Maria Veronica Giordano<sup>1</sup>, Alessandro Gramenzi<sup>1\*</sup>, Carla Ferreri<sup>2\*</sup> and Andrea Boari<sup>1</sup>

## 1. Supplementary tables

**Supplementary Table S1.** Breed, sex, age and bodyweight of the recruited dogs affected by chronic enteropathy (n=48).

| N  | Breed                           | Sex | Age (Months) | BW (Kg) | Diagnosis |
|----|---------------------------------|-----|--------------|---------|-----------|
| 1  | Miniature Poodle                | M   | 84           | 5,3     | IRE (PLE) |
| 2  | Labrador Retriever              | M   | 12           | 35,0    | FRE       |
| 3  | French Bouledogue               | M   | 15           | 10,3    | FRE       |
| 4  | Staffordshire Terrier           | M   | 108          | 23,0    | FRE       |
| 5  | Border collie                   | M   | 72           | 25,2    | FRE       |
| 6  | English Setter                  | M   | 48           | 16,0    | FRE       |
| 7  | American Staffordshire Terrier  | M   | 47           | 23,1    | FRE       |
| 8  | French Bouledogue               | Fs  | 22           | 10,6    | IRE       |
| 9  | Mixed-breed                     | F   | 42           | 18,5    | FRE       |
| 10 | Jack Russell Terrier            | F   | 10           | 4,4     | FRE       |
| 11 | English Bull terrier            | M   | 35           | 26,0    | ARE       |
| 12 | Pitbull                         | M   | 66           | 22,0    | IRE (PLE) |
| 13 | Dogo Argentino                  | M   | 96           | 35,5    | IRE       |
| 14 | Boxer                           | M   | 87           | 17,0    | NRE (PLE) |
| 15 | French Bouledogue               | M   | 13           | 7,1     | FRE       |
| 16 | German Shepherd                 | Fs  | 41           | 25,0    | FRE       |
| 17 | Miniature Poodle                | M   | 83           | 6,0     | FRE       |
| 18 | Belgian Shepherd Dog (Malinois) | M   | 24           | 22,0    | FRE       |
| 19 | Maltese                         | Fs  | 114          | 4,0     | FRE       |
| 20 | German Shepherd                 | M   | 14           | 28,0    | IRE       |
| 21 | Mixed-breed                     | M   | 37           | 36,3    | ARE       |
| 22 | Mixed-breed                     | F   | 32           | 12,5    | ARE       |
| 23 | Labrador Retriever              | Fs  | 76           | 28,2    | IRE       |
| 24 | Dobermann                       | M   | 11           | 30,5    | ARE       |
| 25 | Boxer                           | M   | 12           | 32,3    | FRE       |
| 26 | Dachshund                       | F   | 96           | 4,0     | FRE       |
| 27 | Mixed-breed                     | F   | 96           | 25,0    | FRE       |
| 28 | Maltese                         | F   | 36           | 4,0     | FRE       |
| 29 | Golden Retriever                | M   | 24           | 31,0    | FRE       |
| 30 | Bolognese                       | M   | 104          | 4,6     | ARE (PLE) |
| 31 | Italian Bloodhound              | F   | 48           | 15,0    | IRE (PLE) |
| 32 | German Shepherd                 | M   | 14           | 34,5    | FRE       |
| 33 | Bull terrier                    | F   | 33           | 15,5    | FRE       |

|    |                                             |    |     |      |           |
|----|---------------------------------------------|----|-----|------|-----------|
| 34 | Labrador Retriever                          | M  | 10  | 31,0 | IRE       |
| 35 | Portuguese Sheepdog (Cao da Serra de Aires) | M  | 131 | 12,6 | FRE       |
| 36 | Jack Russell Terrier                        | Fs | 48  | 5,5  | IRE       |
| 37 | Labrador Retriever                          | F  | 24  | 29,7 | NRE (PLE) |
| 38 | Belgian Shepherd Dog (Groenendael)          | Mc | 45  | 28,0 | FRE       |
| 39 | Basset Hound                                | M  | 55  | 23,0 | FRE       |
| 40 | Golden Retriever                            | Fs | 48  | 28,3 | FRE       |
| 41 | Mixed-breed                                 | F  | 84  | 7,3  | IRE       |
| 42 | Mixed-breed                                 | M  | 96  | 17,0 | NRE (PLE) |
| 43 | Miniature Poodle                            | M  | 144 | 6,7  | IRE (PLE) |
| 44 | English Setter                              | M  | 4   | 21,5 | IRE       |
| 45 | Mixed-breed                                 | Fs | 96  | 22,5 | FRE       |
| 46 | Kurzhaar                                    | M  | 72  | 20,2 | FRE (PLE) |
| 47 | Pitbull                                     | M  | 12  | 30,0 | FRE       |
| 48 | Boxer                                       | M  | 18  | 30,0 | FRE       |

M: male; F: female; Mn: neutered male; Fs: spayed female; FRE: food-responsive enteropathy; ARE: antibiotic-responsive enteropathy; IRE: immunosuppressive-responsive enteropathy; NRE: non-responsive enteropathy; PLE: protein-losing enteropathy.

**Supplementary Table S2.** Median values with minimum and maximum in brackets of fatty acids, homeostasis indexes and enzyme activity indexes of healthy dogs and dogs affected by chronic enteropathy. Fatty acids are evaluated as fatty acid methyl esters (FAME) after membrane isolation, lipid extraction and derivatization. The values are expressed as percentage of the found quantities (calculated as µg/mL) from the gas chromatographic analysis, using calibration and quantitation protocols and standard reference compounds for each FAME, as described in Materials and Methods. The GC peak areas of the 10 fatty acids cohort corresponds to ca. 97% of the total peak areas of the chromatogram. Italic values denote statistical significance.

| Variable                               | Healthy Dogs<br>(n = 68) | Chronic Enteropathy<br>(n = 48) | P value |
|----------------------------------------|--------------------------|---------------------------------|---------|
| Palmitic Acid                          | 15.38 (8.25-25.82)       | 11.01 (4.91-13.94)              | <0.0001 |
| Stearic Acid                           | 20.22 (15.61-27.31)      | 23.29 (20.15-28.14)             | <0.0001 |
| <b>Saturated Fatty Acids</b>           | 35.54 (27.88-53.13)      | 34.55 (29.26-41.63)             | 0.026   |
| Palmitoleic Acid                       | 0.26 (0.08-1.40)         | 0.30 (0.05-2.23)                | 0.066   |
| Oleic Acid                             | 9.18 (6.97-24.49)        | 9.48 (7.49-14.68)               | 0.232   |
| Vaccenic Acid                          | 1.95 (1.21-2.65)         | 2.08 (0.07-3.35)                | 0.109   |
| <b>Monounsaturated Fatty Acids</b>     | 11.70 (8.77-26.38)       | 12.17 (8.44-16.62)              | 0.080   |
| Linoleic Acid                          | 14.52 (9.26-21.08)       | 13.06 (7.39-18.98)              | 0.0008  |
| Dihomo-gamma-linolenic Acid            | 1.27 (0.46-2.30)         | 1.63 (0.14-3.35)                | 0.0001  |
| Arachidonic Acid                       | 35.04 (13.44-45.87)      | 35.89 (29.70-43.75)             | 0.11    |
| <i>ω-6 Polyunsaturated Fatty Acids</i> | 50.97 (31.32-60.76)      | 50.93 (43.22-57.10)             | 0.828   |
| EPA                                    | 0.67 (0.25-2.01)         | 0.85 (0.11-2.00)                | 0.029   |
| DHA                                    | 0.99 (0.16-2.61)         | 1.23 (0.42-3.63)                | 0.031   |
| <i>ω-3 Polyunsaturated Fatty Acids</i> | 1.75 (0.52-4.03)         | 2.19 (0.71-4.71)                | 0.013   |
| <b>Polyunsaturated Fatty Acids</b>     | 53.00 (32.98-61.82)      | 53.00 (44.42-59.94)             | 0.545   |
| SFA/MUFA                               | 3.03 (1.42-3.89)         | 2.80 (2.04-3.88)                | 0.002   |
| ω-6/ω-3                                | 29.04 (12.51-100.3)      | 22.44 (10.12-72.68)             | 0.045   |
| PUFA Balance                           | 3.33 (0.99-7.40)         | 4.27 (1.35-8.99)                | 0.045   |

|                             |                     |                      |         |
|-----------------------------|---------------------|----------------------|---------|
| Unsaturation Index          | 194.6 (121.7-233.5) | 200.2 (173.9-221.8)  | 0.018   |
| Peroxidation Index          | 171.0 (84.83-213.7) | 178.3 (149.8-203.0)  | 0.020   |
| Elongase-6 activity         | 0.61 (0.42-1.20)    | 0.87 (0.67-1.65)     | <0.0001 |
| Delta-6 desaturase activity | 0.09 (0.02-0.18)    | 0.12 (0.01-0.27)     | <0.0001 |
| Delta-5 desaturase activity | 25.74 (14.36-65.31) | 22.54 (10.48-257.20) | 0.0057  |
| Delta-9 desaturase activity | 0.45 (0.35-1.43)    | 0.40 (0.04-0.59)     | 0.0003  |

Saturated Fatty Acids (Total SFA) = % C16:0 + % C18:0; Monounsaturated Fatty Acids (Total MUFA) = % C16:1 + % 9c,C18:1 + % 11c,C18:1;  $\omega$ -3 Polyunsaturated Fatty Acids = %EPA + %DHA;  $\omega$ -6 Polyunsaturated Fatty Acids = %LA + %DGLA + %ARA; Polyunsaturated Fatty Acids (PUFA) = %LA + %DGLA + %ARA + %EPA + %DHA; SFA/MUFA = (% C16:0 + % C18:0) / (% C16:1 + % 9c,C18:1 + % 11c,C18:1);  $\omega$ -6/ $\omega$ -3 ratio = (%LA + %DGLA + %ARA) / (%EPA + %DHA); PUFA balance = [(%EPA + %DHA) / Total PUFA]  $\times$  100; Unsaturation index (UI) = (%MUFA  $\times$  1) + (%LA  $\times$  2) + (%DGLA  $\times$  3) + (%ARA  $\times$  4) + (%EPA  $\times$  5) + (%DHA  $\times$  6); Peroxidation index (PI) = (%MUFA  $\times$  0.025) + (%LA  $\times$  1) + (%DGLA  $\times$  2) + (%ARA  $\times$  4) + (%EPA  $\times$  6) + (%DHA  $\times$  8); Elongase-6 activity (EI) = C18:0 / C16:0; Delta-9 desaturase activity (D9DI) = 9c,C18:1 / C18:0; Delta-6 desaturase activity (D6DI) = C20:3 / C18:2; Delta-5 desaturase (D5DI) = C20:4 / C20:3.

**Supplementary Table S3.** Median values with minimum and maximum in brackets of fatty acids, homeostasis indexes and enzyme activity indexes of CE dogs, divided in groups affected by food-responsive enteropathy (FRE), antibiotic-responsive enteropathy (ARE), immunosuppressant-responsive enteropathy (IRE) and non-responsive enteropathy (NRE). Fatty acids are obtained as fatty acid methyl esters (FAME) after membrane isolation, lipid extraction and derivatization. The values are expressed as percentage of the found quantity in  $\mu\text{g/mL}$  referred to the 10 fatty acids of the cluster (% rel. quant.) as total quantity (100%) resulting from the gas chromatographic analysis, using calibration and quantitation protocols and standard reference compounds for each FAME, as described in Materials and Methods. The GC peak areas of the 10 fatty acids cohort corresponds to ca. 97% of the total peak areas of the chromatogram.

| Variable                                | FRE (n=28)          | ARE (n=5)           | IRE/NRE (n=15)      | P value |
|-----------------------------------------|---------------------|---------------------|---------------------|---------|
| Palmitic Acid                           | 10.79 (4.91-13.94)  | 10.44 (10.08-12.65) | 11.44 (7.19-13.13)  | 0.492   |
| Stearic Acid                            | 23.29 (20.27-27.90) | 23.48 (22.07-28.11) | 22.66 (20.15-28.14) | 0.847   |
| <b>Saturated Fatty Acids</b>            | 34.55 (29.26-41.63) | 33.96 (32.37-40.76) | 34.99 (30.89-39.87) | 0.704   |
| Palmitoleic Acid                        | 0.27 (0.05-1.12)    | 0.22 (0.16-0.66)    | 0.40 (0.07-2.23)    | 0.527   |
| Oleic Acid                              | 9.33 (8.09-14.68)   | 9.99 (7.49-11.76)   | 9.98 (7.51-12.35)   | 0.737   |
| Vaccenic Acid                           | 2.09 (0.29-3.24)    | 2.01 (1.76-2.88)    | 2.10 (0.07-3.35)    | 0.955   |
| <b>Monounsaturated Fatty Acids</b>      | 12.13 (8.44-16.62)  | 12.18 (9.75-14.35)  | 12.80 (9.81-16.06)  | 0.556   |
| Linoleic Acid                           | 13.19 (9.75-17.71)  | 14.47 (11.44-16.27) | 12.62 (7.39-18.98)  | 0.382   |
| Dihomo-gamma-linolenic Acid             | 1.63 (0.14-2.74)    | 1.93 (1.36-2.06)    | 1.60 (0.97-3.35)    | 0.425   |
| Arachidonic Acid                        | 36.56 (32.22-43.75) | 35.15 (30.65-38.03) | 35.17 (29.70-38.56) | 0.200   |
| $\omega$ -6 Polyunsaturated Fatty Acids | 51.26 (44.77-57.10) | 51.05 (45.61-57.87) | 52.34 (44.42-57.33) | 0.545   |
| EPA                                     | 0.85 (0.11-2.00)    | 0.78 (0.35-1.03)    | 0.89 (0.17-1.61)    | 0.662   |
| DHA                                     | 1.30 (0.44-3.63)    | 1.21 (0.51-1.45)    | 1.08 (0.42-2.35)    | 0.496   |
| $\omega$ -3 Polyunsaturated Fatty Acids | 2.35 (0.71-4.71)    | 1.99 (0.87-2.48)    | 2.03 (1.11-3.26)    | 0.404   |
| <b>Polyunsaturated Fatty Acids</b>      | 53.34 (46.11-59.94) | 53.04 (45.61-57.87) | 52.34 (44.42-57.33) | 0.493   |
| SFA/MUFA                                | 2.80 (2.04-3.89)    | 2.99 (2.36-3.31)    | 2.66 (2.09-3.56)    | 0.638   |
| $\omega$ -6/ $\omega$ -3                | 21.66 (10.12-72.68) | 25.60 (21.24-58.25) | 23.51 (14.45-42.29) | 0.411   |
| PUFA Balance                            | 4.41 (1.35-8.99)    | 3.76 (1.68-4.49)    | 4.08 (2.31-6.47)    | 0.176   |
| Unsaturation Index                      | 202.7 (175.6-221.8) | 207.6 (173.9-210.9) | 196.1 (174.6-217.1) | 0.131   |
| Peroxidation Index                      | 179.7 (153.2-203.0) | 172.1 (149.8-187.3) | 170.4 (150.6-194.7) | 0.525   |
| Elongase-6 activity                     | 0.88 (0.67-1.65)    | 0.87 (0.73-1.08)    | 0.87 (0.68-1.45)    | 0.889   |

|                             |                   |                   |                   |       |
|-----------------------------|-------------------|-------------------|-------------------|-------|
| Delta-6 desaturase activity | 8.45 (3.88-90.82) | 7.19 (5.92-11.91) | 7.05 (3.65-16.97) | 0.579 |
| Delta-5 desaturase activity | 2.81 (1.99-4.09)  | 2.42 (2.34-2.68)  | 2.87 (1.70-5.20)  | 0.151 |
| Delta-9 desaturase activity | 0.40 (0.04-0.59)  | 0.37 (0.34-0.51)  | 0.42 (0.32-0.55)  | 0.612 |

EPA, eicosapentaenoic acid; DHA, docosahexaenoic acid; SFA, saturated fatty acid; MUFA, monounsaturated fatty acids; PUFA, polyunsaturated fatty acids; FRE, food-responsive enteropathy; ARE, antibiotic-responsive enteropathy; IRE, immunosuppressant-responsive enteropathy; NRE non-responsive enteropathy. Saturated Fatty Acids (Total SFA) = % C16:0 + % C18:0. Monounsaturated Fatty Acids (Total MUFA) = % C16:1 + % 9c,C18:1 + % 11c,C18:1.  $\omega$ -3 Polyunsaturated Fatty Acids = %EPA + %DHA.  $\omega$ -6 Polyunsaturated Fatty Acids = %LA + %DGLA + %ARA. Polyunsaturated Fatty Acids (PUFA) = %LA + %DGLA + %ARA + %EPA + %DHA. SFA/MUFA = (% C16:0 + % C18:0) / (% C16:1 + % 9c,C18:1 + % 11c,C18:1).  $\omega$ -6/ $\omega$ -3 ratio = (%LA + %DGLA + %ARA) / (%EPA + %DHA). PUFA balance = [(%EPA + %DHA) / Total PUFA]  $\times$  100. Unsaturation index (UI) = (%MUFA  $\times$  1) + (%LA  $\times$  2) + (%DGLA  $\times$  3) + (%ARA  $\times$  4) + (%EPA  $\times$  5) + (%DHA  $\times$  6). Peroxidation index (PI) = (%MUFA  $\times$  0.025) + (%LA  $\times$  1) + (%DGLA  $\times$  2) + (%ARA  $\times$  4) + (%EPA  $\times$  6) + (%DHA  $\times$  8). Elongase-6 activity (EI) = C18:0 / C16:0. Delta-9 desaturase activity (D9DI) = 9c,C18:1 / C18:0. Delta-6 desaturase activity (D6DI) = C20:3 / C18:2. Delta-5 desaturase (D5DI) = C20:4 / C20:3.

**Supplementary Table S4.** Median values with minimum and maximum in brackets of fatty acids, homeostasis indexes and enzyme activity indexes of dogs affected by chronic enteropathies without and with loss of protein across the intestine. Fatty acids are obtained as fatty acid methyl esters (FAME) after membrane isolation, lipid extraction and derivatization. The values are expressed in  $\mu$ g/mL as percentage of the found quantity referred to the 10 fatty acids of the cluster (% rel. quant.) as total quantity (100%) resulting from the gas chromatographic analysis, using calibration and quantitation protocols and standard reference compounds for each FAME, as described in Materials and Methods. The GC peak areas of the 10 fatty acids cohort corresponds to ca. 97% of the total peak areas of the chromatogram.

| Variable                                                 | CE (Non-PLE)(n = 39) | PLE (n = 9)         | P value |
|----------------------------------------------------------|----------------------|---------------------|---------|
| Palmitic Acid                                            | 10.82 (4.91-13.94)   | 11.49 (7.19-13.13)  | 0.419   |
| Stearic Acid                                             | 23.35 (20.27-28.11)  | 22.38 (20.15-20.14) | 0.839   |
| <b>Saturated Fatty Acids</b>                             | 34.68 (29.26-41.63)  | 33.77 (33.28-39.87) | 0.942   |
| Palmitoleic Acid                                         | 0.26 (0.05-1.45)     | 0.4785 (0.07-2.22)  | 0.208   |
| Oleic Acid                                               | 9.3 (7.49-14.68)     | 10.43 (9.77-12.35)  | 0.076   |
| Vaccenic Acid                                            | 2.05 (0.29-3.24)     | 2.409 (0.07-3.35)   | 0.321   |
| <b>Monounsaturated Fatty Acids</b>                       | 12.12 (8.44-16.62)   | 13.31 (10.58-16.06) | 0.076   |
| Linoleic Acid                                            | 13.14 (9.75-18.54)   | 12.62 (7.39-18.98)  | 0.839   |
| Dihomo-gamma-linolenic Acid                              | 1.645 (0.14-3.35)    | 1.46 (0.97-2.91)    | 0.819   |
| Arachidonic Acid                                         | 36.31 (29.70-43.75)  | 35.24 (32.26-38.44) | 0.232   |
| <i><math>\omega</math>-6 Polyunsaturated Fatty Acids</i> | 51.05 (44.03-57.10)  | 50.84 (43.22-54.19) | 0.554   |
| EPA                                                      | 0.86 (0.11-2.00)     | 0.8203 (0.17-1.39)  | 0.232   |
| DHA                                                      | 1.21 (0.42-3.63)     | 1.27 (0.74-2.35)    | 0.875   |
| <i><math>\omega</math>-3 Polyunsaturated Fatty Acids</i> | 2.20 (0.71-4.71)     | 2.09 (1.1-3.26)     | 0.222   |
| <b>Polyunsaturated Fatty Acids</b>                       | 53.04 (45.61- 59.94) | 52.47 (44.42-55.66) | 0.288   |
| SFA/MUFA                                                 | 2.857 (2.04-3.88)    | 2.538 (2.08-3.19)   | 0.065   |
| $\omega$ -6/ $\omega$ -3                                 | 21.79 (10.12-72.68)  | 24.77(14.45-42.29)  | 0.696   |
| PUFA Balance                                             | 4.38 (1.35-8.99)     | 3.88 (2.3-6.47)     | 0.682   |
| Unsaturation Index                                       | 199.9 (173.9-221.8)  | 200.5 (174.6-207.0) | 0.264   |
| Peroxidation Index                                       | 178.8 (149.8-203.0)  | 177.7 (150.6-188.2) | 0.259   |
| Elongase-6 activity                                      | 0.87 (0.67-1.65)     | 0.93 (0.69-1.45)    | 0.415   |
| Delta-6 desaturase activity                              | 8.23 (3.65-90.82)    | 7.19 (5.73-12.40)   | 0.751   |

|                             |                  |                  |       |
|-----------------------------|------------------|------------------|-------|
| Delta-5 desaturase activity | 2.80 (1.84-4.09) | 2.74 (1.70-5.20) | 0.840 |
| Delta-9 desaturase activity | 0.40 (0.04-0.59) | 0.43 (0.37-0.55) | 0.08  |

EPA, eicosapentaenoic acid; DHA, docosahexaenoic acid; SFA, saturated fatty acid; MUFA, monounsaturated fatty acids; PUFA, polyunsaturated fatty acids; CE, chronic enteropathy; PLE, protein-losing enteropathy. Saturated Fatty Acids (Total SFA) = % C16:0 + % C18:0. Monounsaturated Fatty Acids (Total MUFA) = % C16:1 + % 9c,C18:1 + % 11c,C18:1.  $\omega$ -3 Polyunsaturated Fatty Acids = %EPA + %DHA.  $\omega$ -6 Polyunsaturated Fatty Acids = %LA + %DGLA + %ARA. Polyunsaturated Fatty Acids (PUFA) = %LA + %DGLA + %ARA + %EPA + %DHA. SFA/MUFA = (% C16:0 + % C18:0) / (% C16:1 + % 9c,C18:1 + % 11c,C18:1).  $\omega$ -6/ $\omega$ -3 ratio = (%LA + %DGLA + %ARA) / (%EPA + %DHA). PUFA balance = [(%EPA + %DHA) / Total PUFA]  $\times$  100. Unsaturation index (UI) = (%MUFA  $\times$  1) + (%LA  $\times$  2) + (%DGLA  $\times$  3) + (%ARA  $\times$  4) + (%EPA  $\times$  5) + (%DHA  $\times$  6). Peroxidation index (PI) = (%MUFA  $\times$  0.025) + (%LA  $\times$  1) + (%DGLA  $\times$  2) + (%ARA  $\times$  4) + (%EPA  $\times$  6) + (%DHA  $\times$  8). Elongase-6 activity (EI) = C18:0 / C16:0. Delta-9 desaturase activity (D9DI) = 9c,C18:1 / C18:0. Delta-6 desaturase activity (D6DI) = C20:3 / C18:2. Delta-5 desaturase (D5DI) = C20:4 / C20:3.

**Supplementary Table S5.** Median values with minimum and maximum in brackets of fatty acids, homeostasis indexes and enzyme activity indexes of that responded to therapeutic trials and dogs that poorly or not responded (NRE). Fatty acids are evaluated as fatty acid methyl esters (FAME) after membrane isolation, lipid extraction and derivatization. The values are expressed in  $\mu\text{g/mL}$  as percentage of the found quantity referred to the 10 fatty acids of the cluster (% rel. quant.) as total quantity (100%) from the gas chromatographic analysis, using calibration and quantitation protocols and standard reference compounds for each FAME, as described in Materials and Methods. The GC peak areas of the 10 fatty acids cohort corresponds to ca. 97% of the total peak areas of the chromatogram. Italic values denote statistical significance.

| Variable                                                 | RE (n = 45)         | NRE (n = 3)         | P value |
|----------------------------------------------------------|---------------------|---------------------|---------|
| Palmitic Acid                                            | 10.82 (4.91-13.94)  | 11.73 (11.25-12.81) | 0.282   |
| Stearic Acid                                             | 23.35 (20.15-28.11) | 22.34 (22.3-28.14)  | 0.936   |
| <b>Saturated Fatty Acids</b>                             | 34.43 (29.26-41.63) | 35.15 (33.55-39.87) | 0.462   |
| Palmitoleic Acid                                         | 0.33 (0.05-2.22)    | 0.25 (0.21-1.06)    | 0.747   |
| Oleic Acid                                               | 9.37 (7.49-14.68)   | 12.14 (9.42-12.35)  | 0.074   |
| Vaccenic Acid                                            | 2.06 (0.07-3.24)    | 2.69 (2.64-3.35)    | 0.007   |
| <b>Monounsaturated Fatty Acids</b>                       | 12.14 (8.44-16.62)  | 15.71 (12.38-16.06) | 0.031   |
| Linoleic Acid                                            | 13.14 (9.75-18.98)  | 9.97 (7.39-14.19)   | 0.170   |
| Dihomo-gamma-linolenic Acid                              | 1.6 (0.14-3.35)     | 1.29 (0.97-1.40)    | 0.060   |
| Arachidonic Acid                                         | 35.90 (29.70-43.75) | 35.24 (32.26-38.44) | 0.688   |
| <i><math>\omega</math>-6 Polyunsaturated Fatty Acids</i> | 51.05 (44.03-57.10) | 47.13 (43.22-50.84) | 0.054   |
| EPA                                                      | 0.85 (0.11-2.00)    | 0.63 (0.20-1.05)    | 0.303   |
| DHA                                                      | 1.27 (0.42-3.63)    | 1.00 (0.99-2.21)    | 0.968   |
| <i><math>\omega</math>-3 Polyunsaturated Fatty Acids</i> | 2.20 (0.71-4.71)    | 1.63 (1.19-3.26)    | 0.629   |
| <b>Polyunsaturated Fatty Acids</b>                       | 53.08 (45.61-59.94) | 50.4 (44.42-52.47)  | 0.060   |
| SFA/MUFA                                                 | 2.80 (2.04-3.88)    | 2.53 (2.08-2.84)    | 0.841   |
| $\omega$ -6/ $\omega$ -3                                 | 21.79 (10.12-72.68) | 31.06 (14.45-36.11) | 0.132   |
| PUFA Balance                                             | 4.38 (1.35-9.99)    | 3.11 (2.69-6.47)    | 0.811   |
| Unsaturation Index                                       | 200.5 (173.9-221.8) | 195.1 (174.6-207.0) | 0.284   |
| Peroxidation Index                                       | 178.8 (149.8-203.0) | 170.1 (150.6-188.2) | 0.411   |
| Elongase-6 activity                                      | 0.87 (0.67-1.65)    | 1.04 (0.74-1.10)    | 0.511   |
| Delta-6 desaturase activity                              | 8.20 (3.65-90.82)   | 10.11 (5.73-10.21)  | 0.714   |
| Delta-5 desaturase activity                              | 2.77 (1.70-4.09)    | 3.23 (2.48-5.20)    | 0.216   |
| Delta-9 desaturase activity                              | 0.40 (0.04-0.59)    | 0.43 (0.42-0.55)    | 0.146   |

EPA, eicosapentaenoic acid; DHA, docosahexaenoic acid; SFA, saturated fatty acid; MUFA, monounsaturated fatty acids; PUFA, polyunsaturated fatty acids; RE, responsive enteropathy; NRE non-responsive enteropathy. Saturated Fatty Acids (Total SFA) = % C16:0 + % C18:0. Monounsaturated Fatty Acids (Total MUFA) = % C16:1 + % 9c,C18:1 + % 11c,C18:1.  $\omega$ -3 Polyunsaturated Fatty Acids = %EPA + %DHA.  $\omega$ -6 Polyunsaturated Fatty Acids = %LA + %DGLA + %ARA. Polyunsaturated Fatty Acids (PUFA) = %LA + %DGLA + %ARA + %EPA + %DHA. SFA/MUFA = (% C16:0 + % C18:0) / (% C16:1 + % 9c,C18:1 + % 11c,C18:1).  $\omega$ -6/ $\omega$ -3 ratio = (%LA + %DGLA + %ARA) / (%EPA + %DHA). PUFA balance = [(%EPA + %DHA) / Total PUFA]  $\times$  100. Unsaturation index (UI) = (%MUFA  $\times$  1) + (%LA  $\times$  2) + (%DGLA  $\times$  3) + (%ARA  $\times$  4) + (%EPA  $\times$  5) + (%DHA  $\times$  6). Peroxidation index (PI) = (%MUFA  $\times$  0.025) + (%LA  $\times$  1) + (%DGLA  $\times$  2) + (%ARA  $\times$  4) + (%EPA  $\times$  6) + (%DHA  $\times$  8). Elongase-6 activity (EI) = C18:0 / C16:0. Delta-9 desaturase activity (D9DI) = 9c,C18:1 / C18:0. Delta-6 desaturase activity (D6DI) = C20:3 / C18:2. Delta-5 desaturase (D5DI) = C20:4 / C20:3.

## 2. Material

For the membrane work-up and fatty acid methyl ester (FAME) transformation the materials with the corresponding suppliers are indicated here below:

| Materials                                                   | Company                                      |
|-------------------------------------------------------------|----------------------------------------------|
| n-Hexane 95%                                                | TITOLCHIMICA, Pontecchio Polesine (Ro) Italy |
| Methyl alcohol HPLC                                         | TITOLCHIMICA Pontecchio Polesine (Ro) Italy  |
| Chloroform extra pure 99.5%                                 | TITOLCHIMICA Pontecchio Polesine (Ro) Italy  |
| PBS pH 7,4 RS                                               | Carlo Erba, Milan ( Italy)                   |
| Polar Lipid Mixture (quantitative)                          | MATREYA LLC State College, PA, USA           |
| non-Polar Lipid Mixture B (quantitative)                    | MATREYA LLC State College, PA,USA            |
| Phosphatidylserine                                          | MATREYA LLC State College, PA, USA           |
| L- $\alpha$ -Phosphatidylcholine                            | Merck, <u>Darmstadt, Germany</u>             |
| ALUGRAM Xtra sheets 200 $\times$ 200mm                      | Carlo Erba, Milan Italy                      |
| Potassium hydroxide, pellets RPE - For analysis             | Carlo Erba, Milan Italy                      |
| Sodium sulfate anhydrous RS - For anhydrification           | Carlo Erba, Milan Italy                      |
| C16:0 – palmitic acid methyl ester                          | Merck, <u>Darmstadt Germany</u>              |
| C16:1 – palmitoleic acid methyl ester                       | Merck, <u>Darmstadt Germany</u>              |
| C18:0 – stearic acid methyl ester                           | Supelco, Bellefonte, PA, USA                 |
| 9c, C18:1 – oleic acid methyl ester                         | Merck, <u>Darmstadt, Germany</u>             |
| 11c, C18:1 – vaccenic acid methyl ester                     | Supelco, Bellefonte, PA ,USA                 |
| LA omega-6 – C18:2 – linoleic acid methyl ester             | Merck, <u>Darmstadt Germany</u>              |
| DGLA omega-6 – C20:3 dihomogammalinolenic acid methyl ester | Merck, <u>Darmstadt Germany</u>              |
| ARA omega-6 C20:4 – arachidonic acid methyl ester           | Merck, <u>Darmstadt Germany</u>              |
| EPA omega-3 – C20:5 – eicosapentaenoic acid methyl ester    | Supelco, Bellefonte, PA, USA                 |
| DHA omega-3 – C22:6 – docosahexaenoic acid methyl ester     | Merck, <u>Darmstadt Germany</u>              |
| Supelco 27 component FAME mix                               | Supelco, Bellefonte, PA, USA                 |

Materials were used as received.

The analytical procedure followed the steps represented in **Figure S1**.

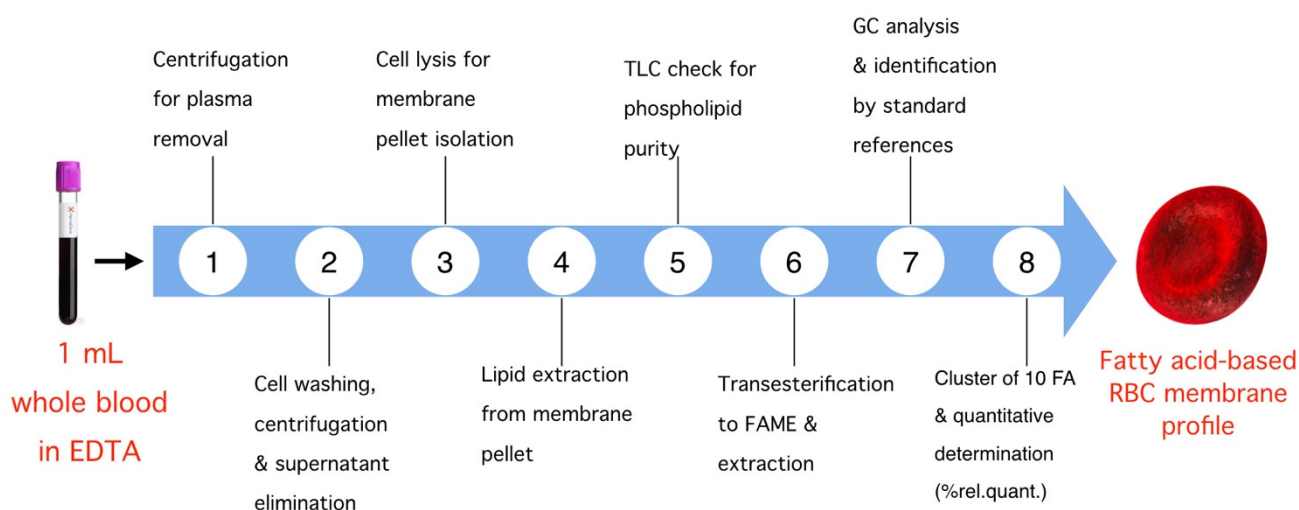

**Supplementary Figure S1.** Steps of the laboratory procedure from the blood sample in EDTA to the fatty acid-based RBC membrane profile.

### 3. Details of the GC analysis of FAME – Calibration procedure

In this paper we proceeded with the determination of the previously reported benchmark for membrane fatty acid profile [29], analyzing a cluster of 10 fatty acids, which also corresponds to chromatographic peak areas >97% (see representative GC run reported in Supplementary Figure 2). This cluster consists of: 2 saturated fatty acids (SFA: palmitic and stearic acids); 3 monounsaturated fatty acids (MUFA, palmitoleic, oleic and cis-vaccenic acids); 3 polyunsaturated fatty acids omega-6 (PUFA, linoleic, dihomo-gamma linolenic, arachidonic acids); 2 polyunsaturated fatty acids omega-3 (PUFA, eicosapentaenoic and docosahexaenoic acids) as shown in Table 3 of the main text.

The quantitation of the fatty acids was carried out by calibration procedures, for which the following protocol has been followed:

initially a n-hexane (HPLC grade, Titolchimica) 5mM solution of stearic acid methyl ester (2 mg in 1340 µL) was prepared and 1µl was directly injected to the Agilent 7890B GC system equipped with a flame ionization detector and a DB-23 (50%-Cyanopropyl)-methylpolysiloxane capillary column (60 m, 0.25 mm i.d., 0.25 µm film thickness, Agilent, Milan). The following oven conditions were established to be kept for all the analyses: the initial temperature was 165 °C, held for 3 min, followed by an increase of 1 °C/min up to 195 °C, held for 40 min, followed by a second increase of 10 °C/min up to 240 °C, held for 10 min. The carrier gas was hydrogen, held at a constant pressure of 16.482 psi. The injections were repeated in triplicates.

The second round of injections for calibration was then performed with 0.5 mM solution of the same fatty acid methyl ester (taking 100µL of the initial solution and diluting with 900µL of n-hexane), injecting 1 µL as previously described for triplicates.

The same protocol was carried out using dilutions of 0.05mM, 0.005mM and 0.0005mM of stearic acid methyl ester.

In all the injections a calibration curve was created using the software of the GC equipment (Agilent 7890B GC system, Agilent, Milan). Using the concentration of 0.0005mM for methyl stearate, the corresponding peak area was detectable but not quantifiable, indicating this concentration as the limit of detection (LOD) of the specific GC system (<0.5nM).

The above protocol has been followed for all the fatty acids of the cohort.

| Reference FAMES |           |                                                                                     |                                                                                      |                                                                                       |                                                                                       |
|-----------------|-----------|-------------------------------------------------------------------------------------|--------------------------------------------------------------------------------------|---------------------------------------------------------------------------------------|---------------------------------------------------------------------------------------|
| SFA             | C16:0     | 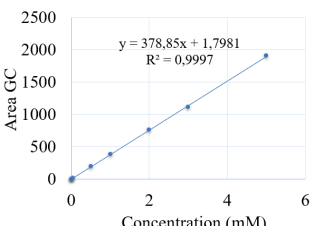   |    |    |                                                                                       |
|                 | C18:0     |    |    |    |                                                                                       |
|                 | MUFA      | 9c,C16:1                                                                            |    |    |   |
|                 | 9c,C18:1  |  |  |  |                                                                                       |
|                 | 11c,C18:1 |  |  |  |                                                                                       |
|                 | PUFA      | EPA                                                                                 |   |   |  |
|                 | DHA       |  |  |  |                                                                                       |



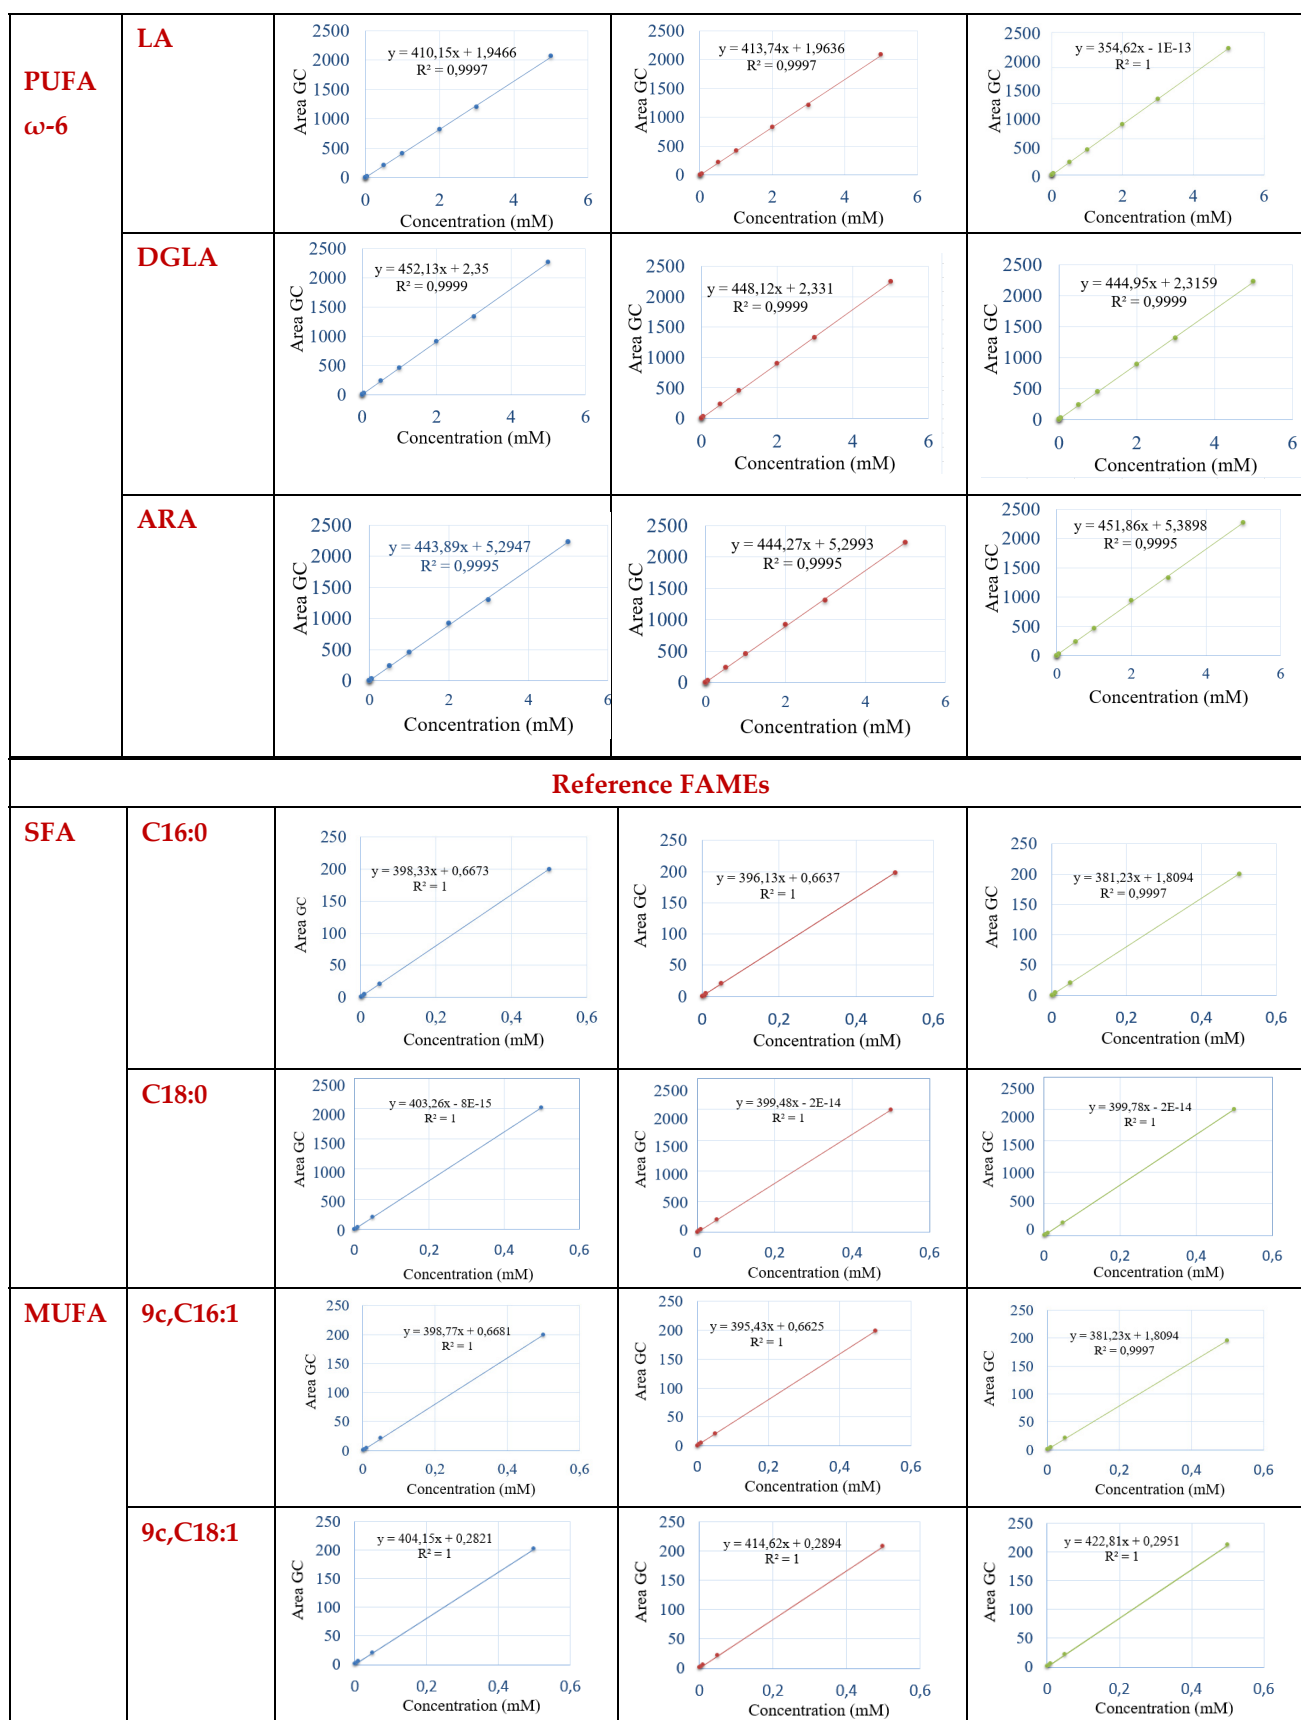

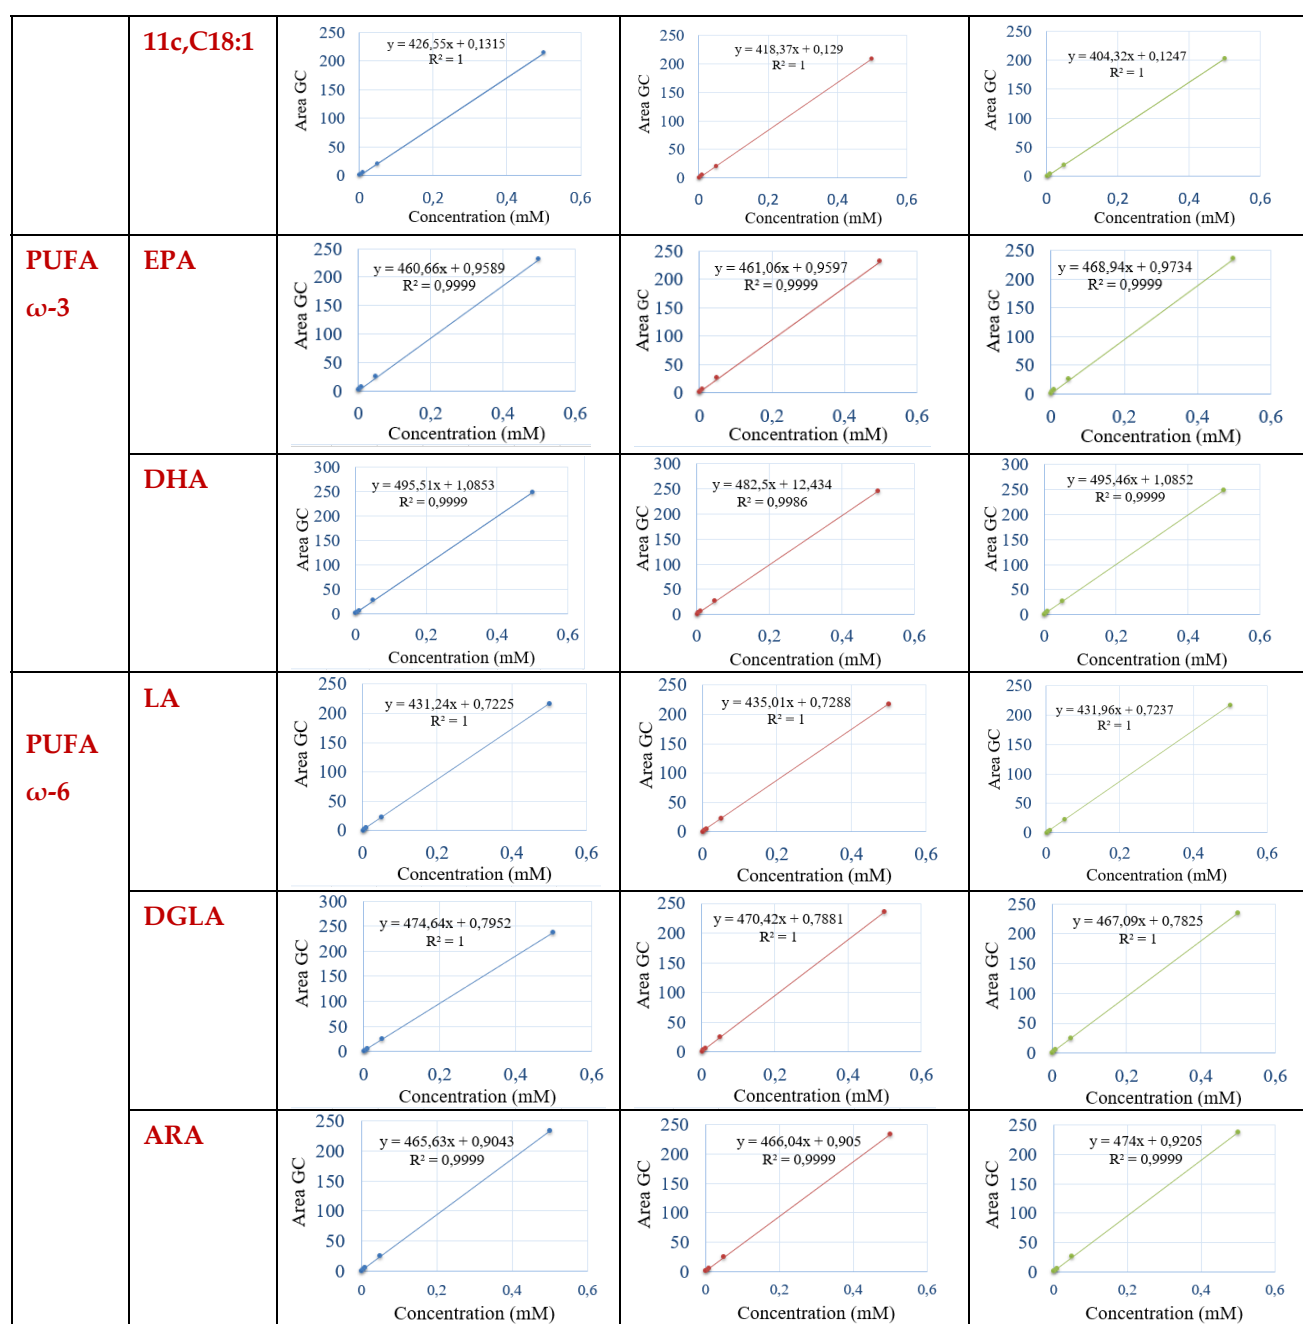

**Supplementary Figure S2.** Calibration curves of the 10 fatty acids at high (0.5–5 mM) and low (from 0.001 mM to 0.5 mM) concentration ranges, chosen as representatives of the SFA, MUFA and PUFA families present in the erythrocyte membrane phospholipids.

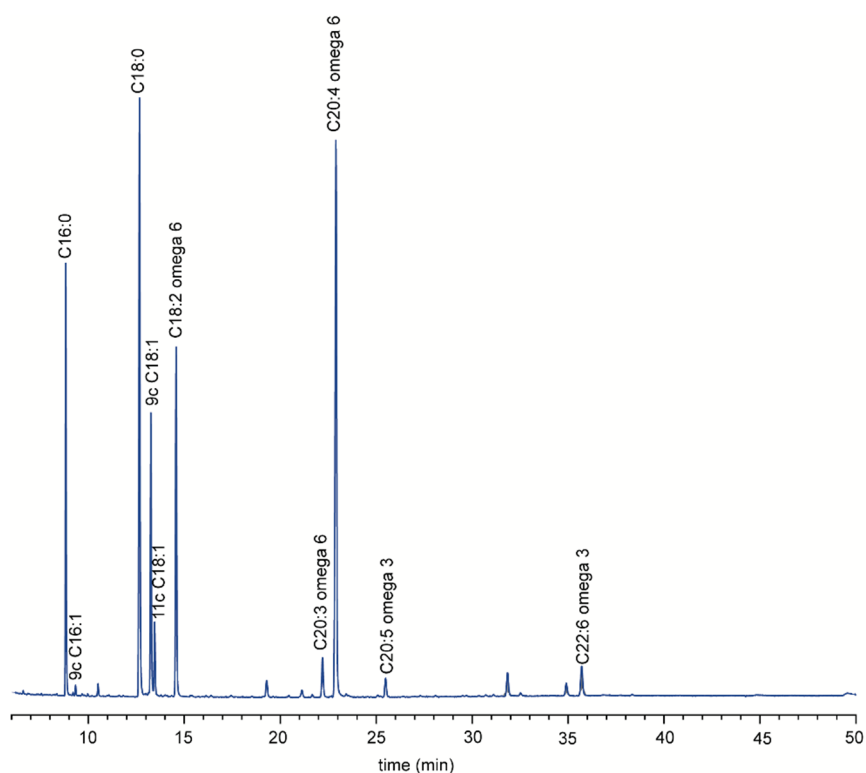

**Supplementary Figure S3.** Representative GC chromatogram of the FAME obtained from dog erythrocyte membrane phospholipids after work-up, as described in the main text. The 10 fatty acids chosen for the cluster are satisfactorily separated and recognized by appropriate standard references. The sum of their areas corresponds to >97% of the total peak areas.

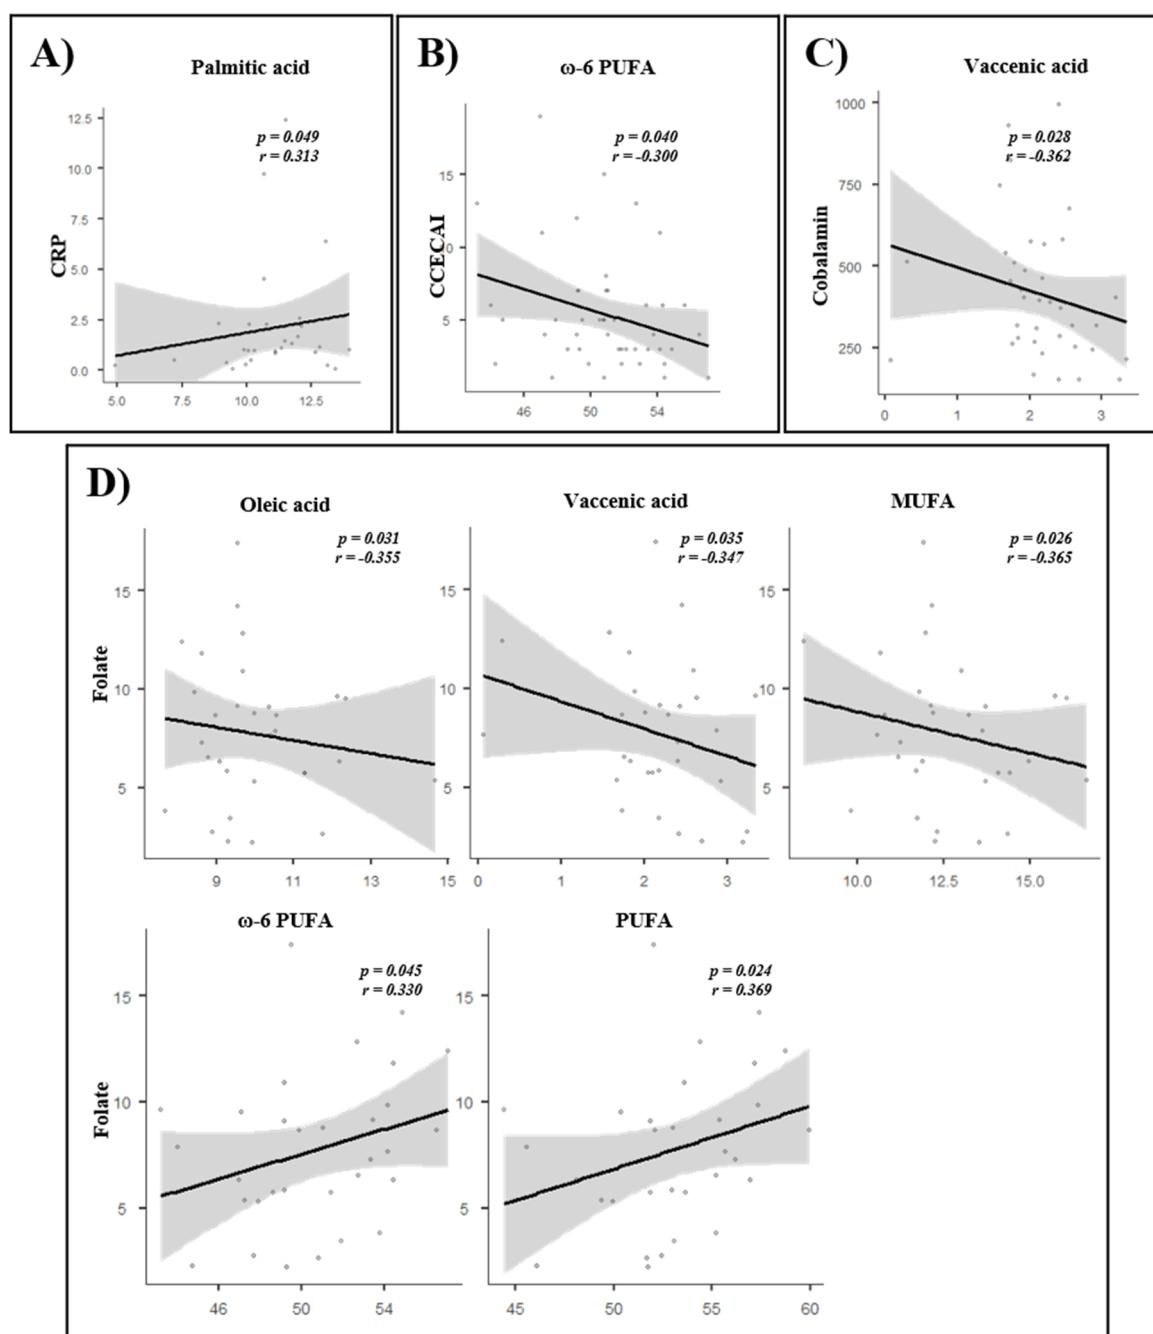

**Supplementary Figure S4.** Spearman rank correlation between: (A) C-reactive protein and palmitic acid, (B) the Canine Chronic Enteropathy Clinical Activity Index and  $\omega$ -6 polyunsaturated fatty acids, (C) cobalamin and vaccenic acid, (D) folate and oleic acid, vaccenic acid, total monounsaturated fatty acids,  $\omega$ -6 polyunsaturated fatty acids and total polyunsaturated fatty acids. CRP, C-reactive protein; CCECAI, Canine Chronic Enteropathy Clinical Activity Index; MUFA monounsaturated fatty acids; PUFA, polyunsaturated fatty acids.

## Reference

29. Prasinou, P.; Crisi, P.E.; Chatgililoglu, C.; Di Tommaso, M.; Sansone, A.; Gramenzi, A.; Belà, B.; De Santis, F.; Boari, A.; Ferreri, C. The Erythrocyte Membrane Lipidome of Healthy Dogs: Creating a Benchmark of Fatty Acid Distribution and Interval Values. *Front Vet Sci* **2020**, *7*, 502, doi:10.3389/fvets.2020.00502.
